# Supplementary material for: Insights into the mechanism and aging of a noble-metal free H2-evolving dye-sensitized photocathode
Source: PubMed Central journal article supplement — Chem Sci. 2018 Jul 10;9(32):6721–38. doi: 10.1039/c8sc00899j (PMC6115630; doi:10.1039/c8sc00899j), 2018-07-10
Supplement: SC-009-C8SC00899J-s001.pdf [file SC-009-C8SC00899J-s001.pdf]

## Electronic Supporting Information for

### Insights into Mechanism and Aging of a noble-metal free H<sub>2</sub>-evolving Dye-Sensitized Photocathode

Nicolas Kaeffer,<sup>1†</sup> Christopher D. Windle,<sup>1†</sup> Romain Brisse,<sup>2</sup> Corinne Gablin,<sup>3</sup> Didier Leonard,<sup>3</sup> Bruno Jusselme,<sup>2</sup> Murielle Chavarot-Kerlidou<sup>1</sup> and Vincent Artero\*<sup>1</sup>

<sup>1</sup>Laboratoire de Chimie et Biologie des Métaux, Université Grenoble Alpes, CNRS UMR 5249, CEA, 17 rue des Martyrs, F-38054 Grenoble, Cedex, France

<sup>2</sup>Laboratory of Innovation in Surface Chemistry and Nanosciences (LICSEN), NIMBE, CEA, CNRS, Université Paris-Saclay, CEA Saclay, 91191 Gif-sur-Yvette, Cedex, France.

<sup>3</sup>Univ Lyon, CNRS, Université Claude Bernard Lyon 1, ENS de Lyon, Institut des Sciences Analytiques, UMR 5280, 5, rue de la Doua, F-69100 Villeurbanne, France.

\*to whom correspondence should be addressed. E-mail address: [vincent.artero@cea.fr](mailto:vincent.artero@cea.fr), [www.solhycat.com](http://www.solhycat.com)

†These authors contributed equally

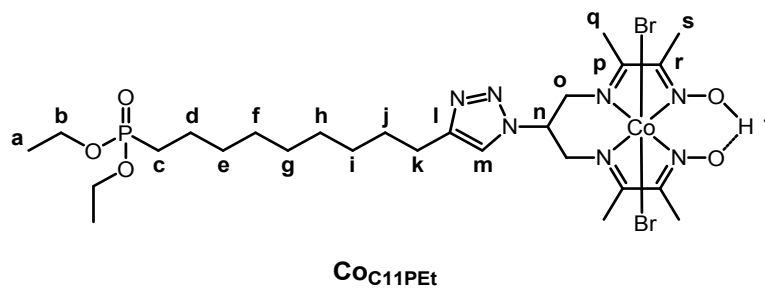

**Figure S1.** Atoms numbering in **CoC<sub>11</sub>PEt**

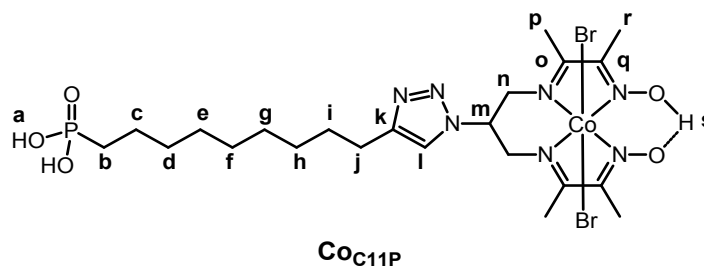

**Figure S2.** Atoms numbering in **CoC<sub>11</sub>P**

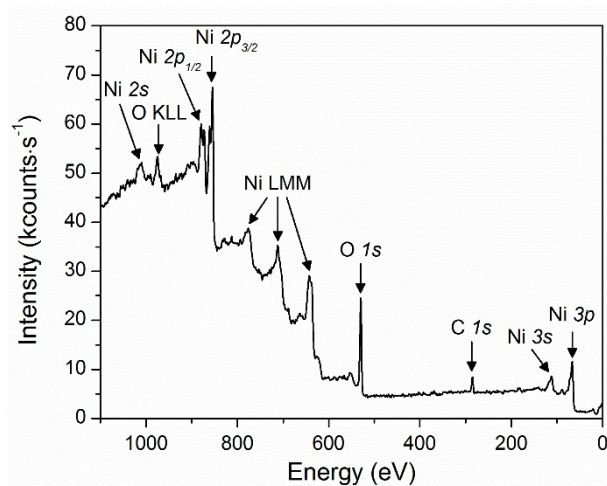

**Figure S3.** XPS analysis of a Dyenamo **NiO** electrode sintered at 450°C. The core levels of Ni and of O represent main features displayed on the spectrum. The C *1s* peak was used as a reference (at 284.8 eV) for the energy calibration. The presence of carbon is either adventitious (from an external contaminant) and/or residual from the preparation of NiO.

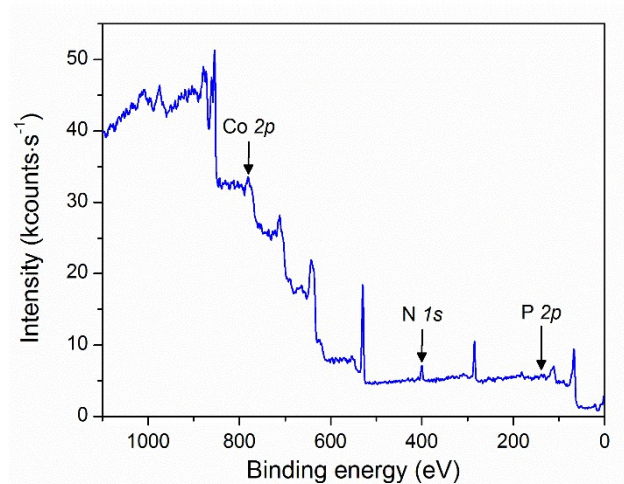

**Figure S4.** XPS analysis of a NiO|Co<sub>C11</sub>P electrode in the survey mode.

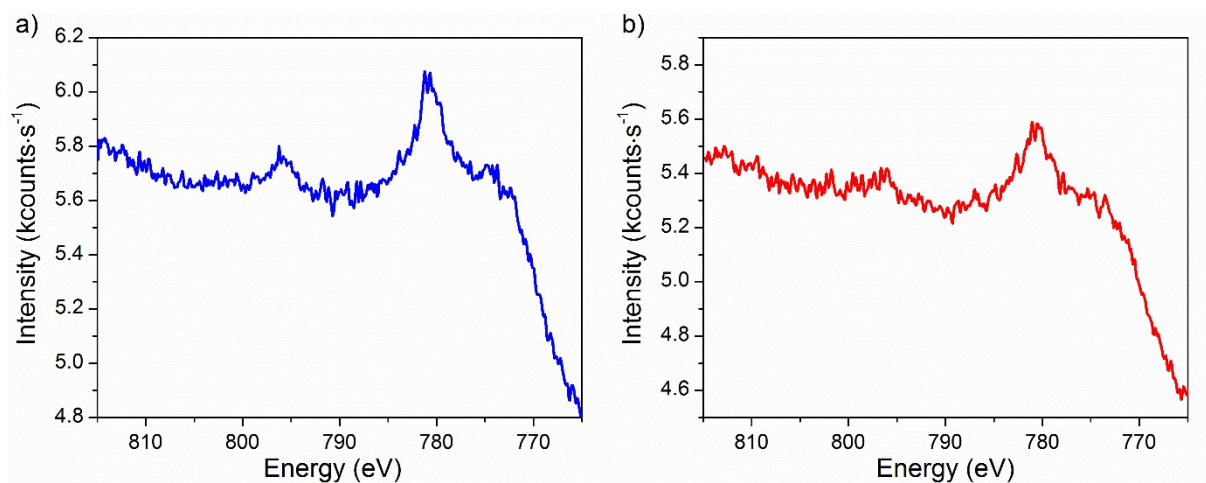

**Figure S5.** High resolution XPS analyses of the a) NiO|Co<sub>C11</sub>P, and b) NiO|RBG-174|Co<sub>C11</sub>P electrodes at the baseline-corrected Co 2p core levels.

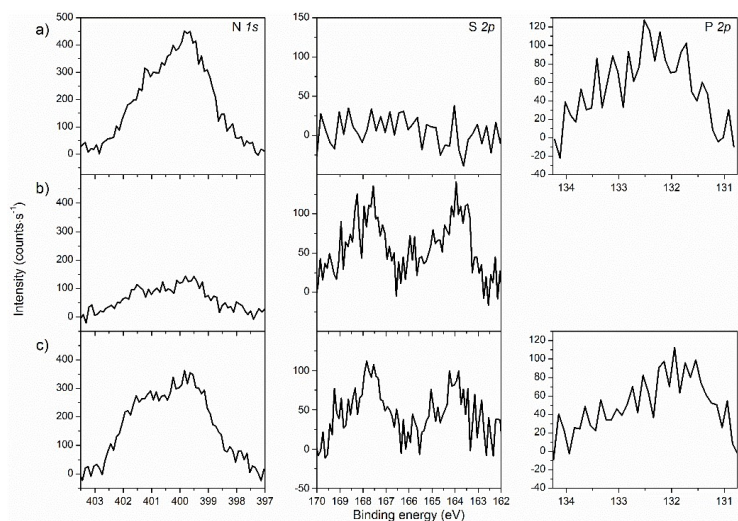

**Figure S6.** High resolution XPS analyses of the a) **NiO|CoC<sub>11</sub>P**, b) **NiO|RBG-174** and c) **NiO|RBG-174|CoC<sub>11</sub>P** electrodes at the baseline-corrected N *1s*, S *2p* and P *2p* core levels.

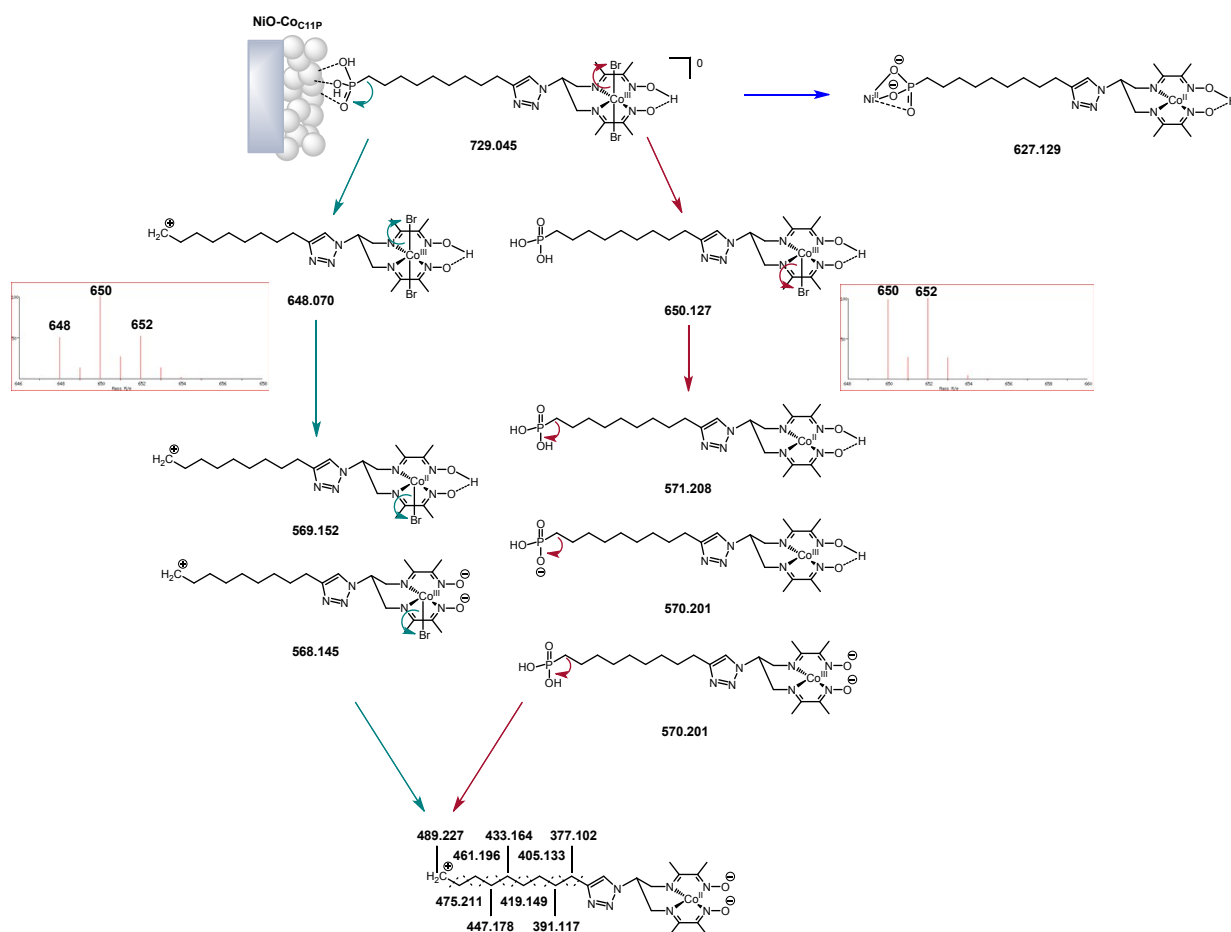

**Figure S7.** Proposed fragments (with corresponding exact masses) for the attribution of the main peaks detected in the ToF-SIMS positive mode spectrum at a **NiO|CoC<sub>11</sub>P** electrode. The secondary ions are monocharged cations; their charges are not shown for the sake of clarity.

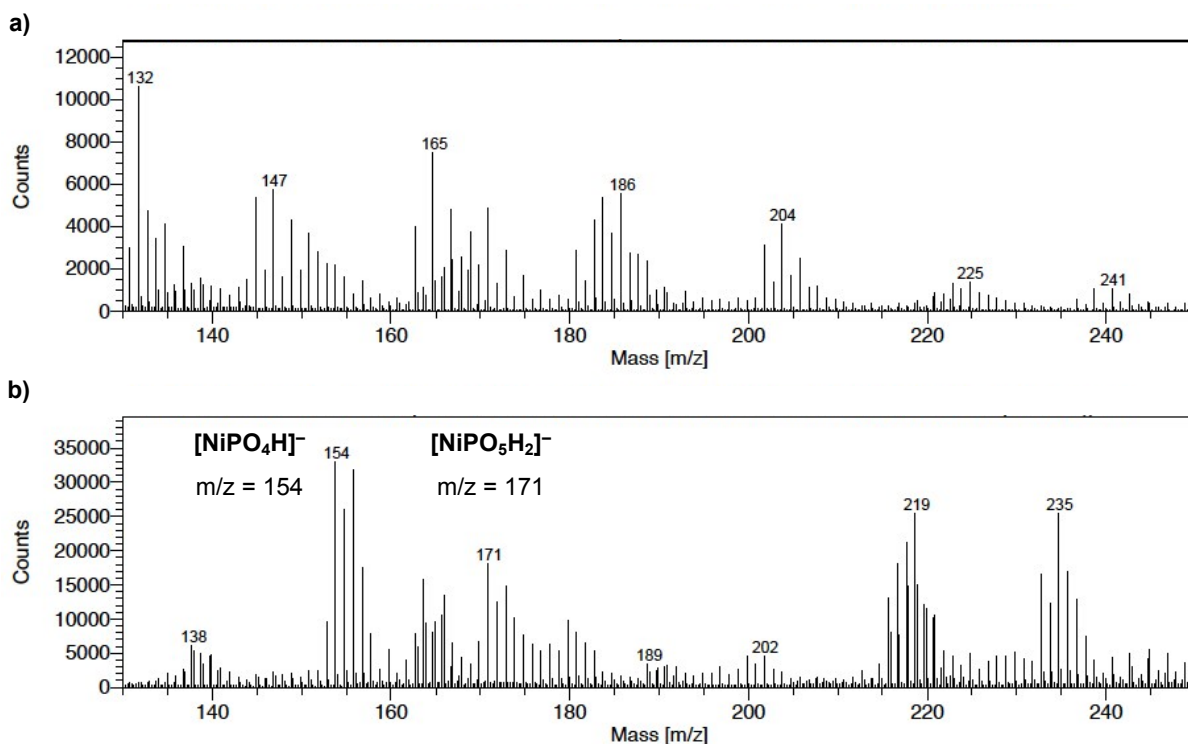

**Figure S8.** Negative mode ToF-SIMS spectra in the  $m/z$  150-250 range for **a)** NiO blank and **b)** NiO|RBG-174|CoC<sub>11</sub>P electrodes.

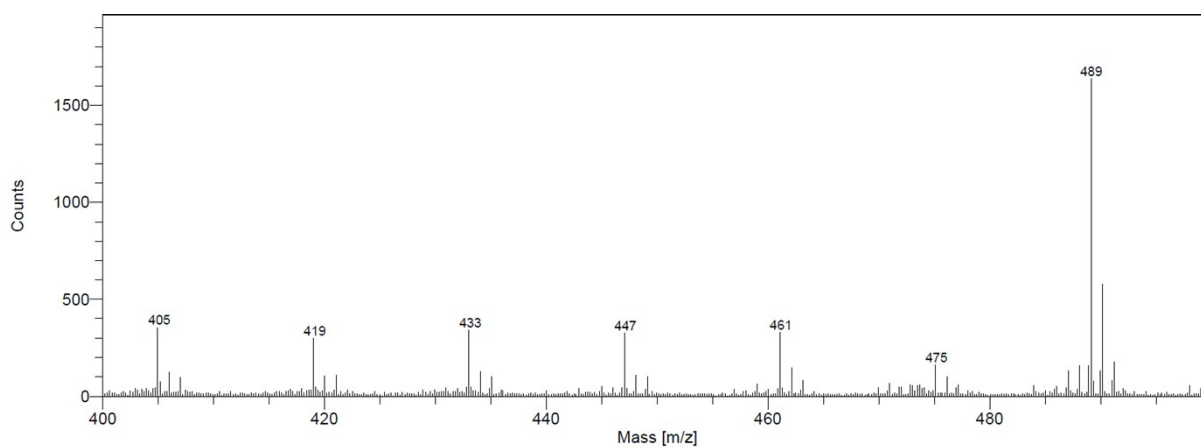

**Figure S9.** ToF-SIMS analysis at the surface of the NiO|CoC<sub>11</sub>P electrode recorded in the positive mode in the  $m/z$  range 400-500.

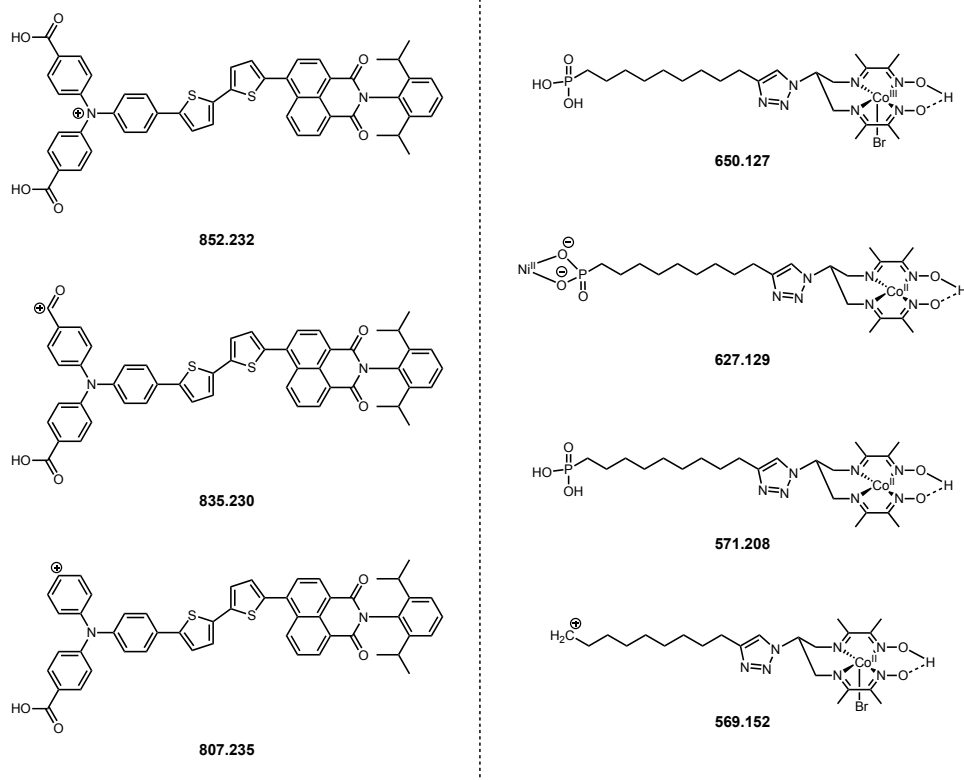

**Figure S10.** Proposed fragments (with corresponding exact masses) for the attribution of the main peaks detected in the ToF-SIMS positive spectrum of the **NiO|RBG-174|Co<sub>C11</sub>P** electrode. The secondary ions are monocharged cations; their charges are not shown for the sake of clarity.

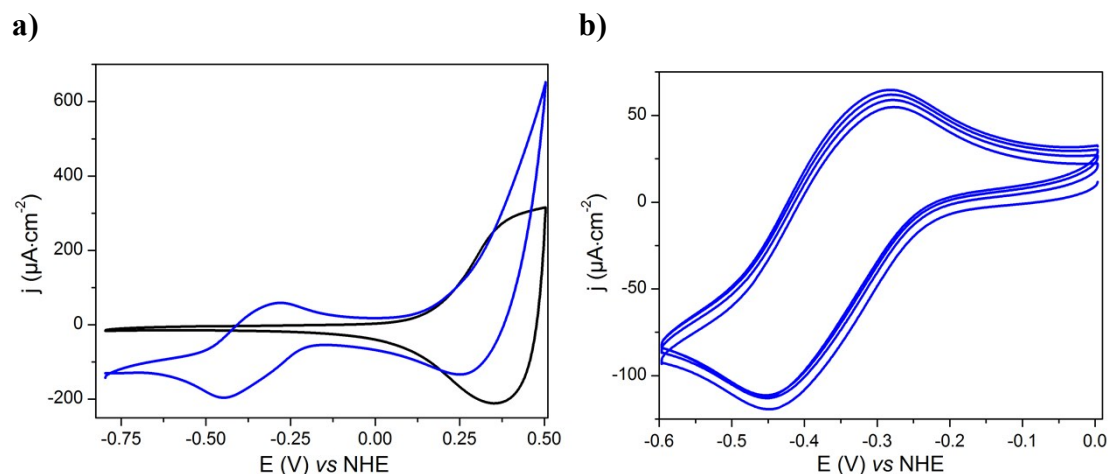

**Figure S11.** a) CVs recorded at a pristine NiO electrode (black line) and at a **NiO|Co<sub>C11</sub>P** electrode (blue line); b) successive scans in the cathodic region at a **NiO|Co<sub>C11</sub>P** electrode with a scan rate of  $100 \text{ mV}\cdot\text{s}^{-1}$  in a NaCl 0.1 M aqueous electrolyte. The broad wave at  $\sim 0.3 \text{ V vs NHE}$  in the CV measured at a pristine NiO electrode is attributed to a surface-confined  $\text{Ni}^{\text{III/II}}$  redox event likely coupled with the exchange of a proton.<sup>1</sup> This feature is also present at the decorated electrode but with a shape slightly modified possibly upon immobilization of the catalyst at the surface.

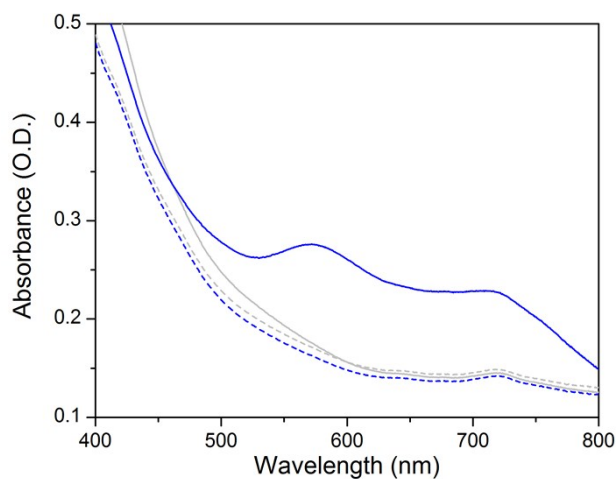

**Figure S12.** UV-visible spectra of a NiO|CoC<sub>11</sub>P electrode (blue lines) and of a pristine NiO electrode (gray lines) poised at  $-0.24$  V vs NHE (dotted lines) then at  $-0.84$  V vs NHE (plain lines) in a NaCl 0.1 M aqueous electrolyte.

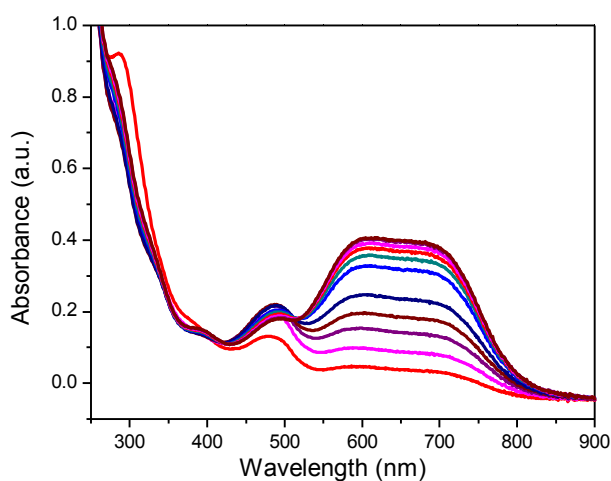

**Figure S13.** UV-visible spectra of a solution of [Co(DO)(DOH)pnBr<sub>2</sub>] (1.05 mM in a 0.1M *n*Bu<sub>4</sub>PF<sub>6</sub> solution in MeCN) recorded at a Pt grid electrode poised at  $-1$  V vs Ag/AgCl after 30, 180, 300, 420, 600, 950, 1200, 1300, 1500, 1700, 1800 s (from red to purple) in a H<sub>2</sub>O/O<sub>2</sub>-free glovebox, with a light path of 1.0 mm.

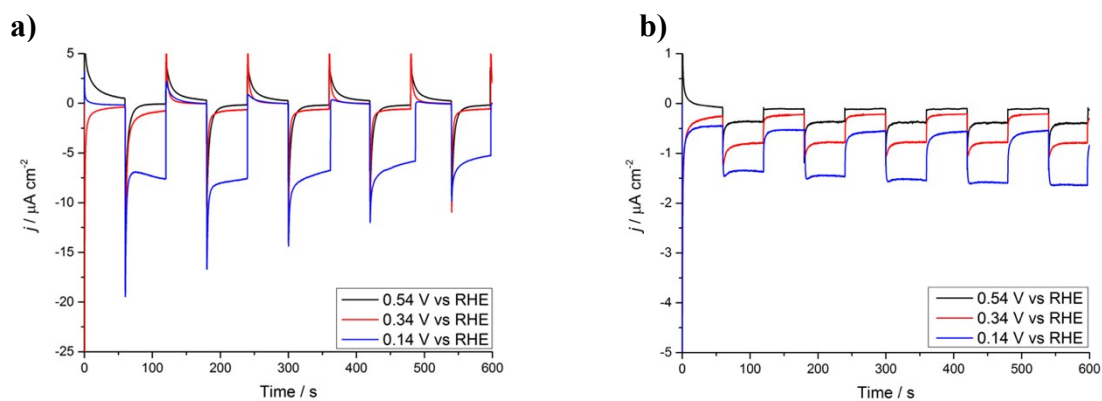

**Figure S14.** Current densities vs time at a)  $\text{NiO|RBG-174|CoC}_{11}\text{P}$  and b)  $\text{NiO|RBG-174|C}_{10}\text{P}$  electrodes poised at 0.14 (red line), 0.34 (blue line) and 0.54 (black line) V vs RHE under chopped light irradiation in MES 0.1M / NaCl 0.1 M aqueous electrolyte at pH 5.5.

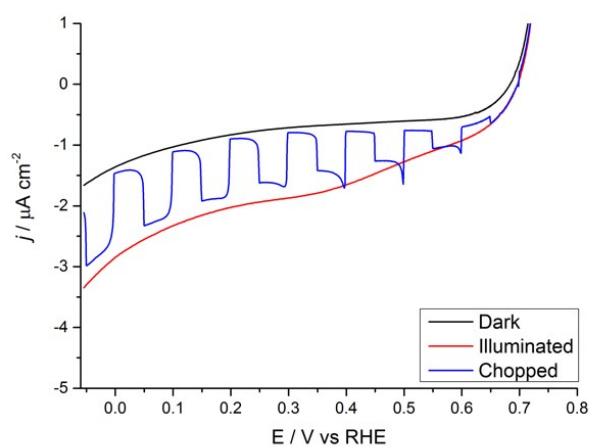

**Figure S15.** LSVs at a  $\text{NiO|RBG-174|C}_{10}\text{P}$  electrode with (red line), without (black line) or with chopped (blue line) light irradiation recorded at a scan rate of  $10 \text{ mV}\cdot\text{s}^{-1}$  in MES 0.1M / NaCl 0.1 M aqueous electrolyte at pH 5.5.



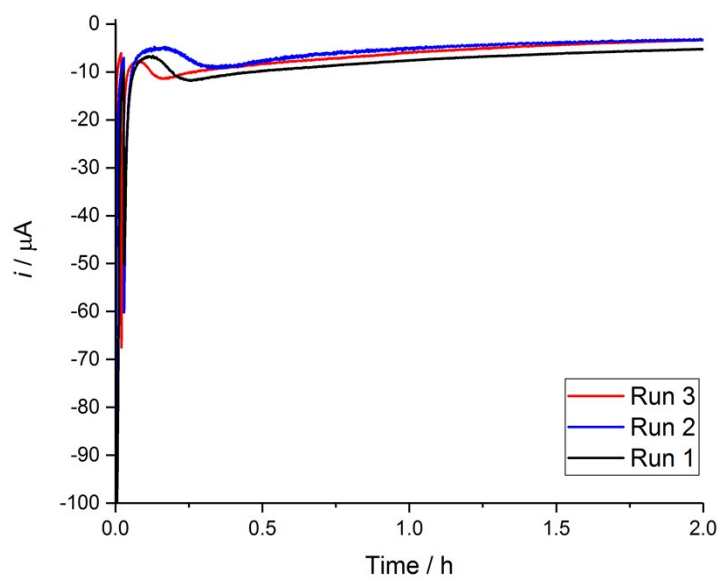

**Figure S16.** Chronoamperometric measurements performed on three distinct **NiO|RBG-174|CoC<sub>11</sub>P** electrodes under light irradiation recorded at 0.14 V vs RHE in MES 0.1M / NaCl 0.1 M aqueous electrolyte at pH 5.5.

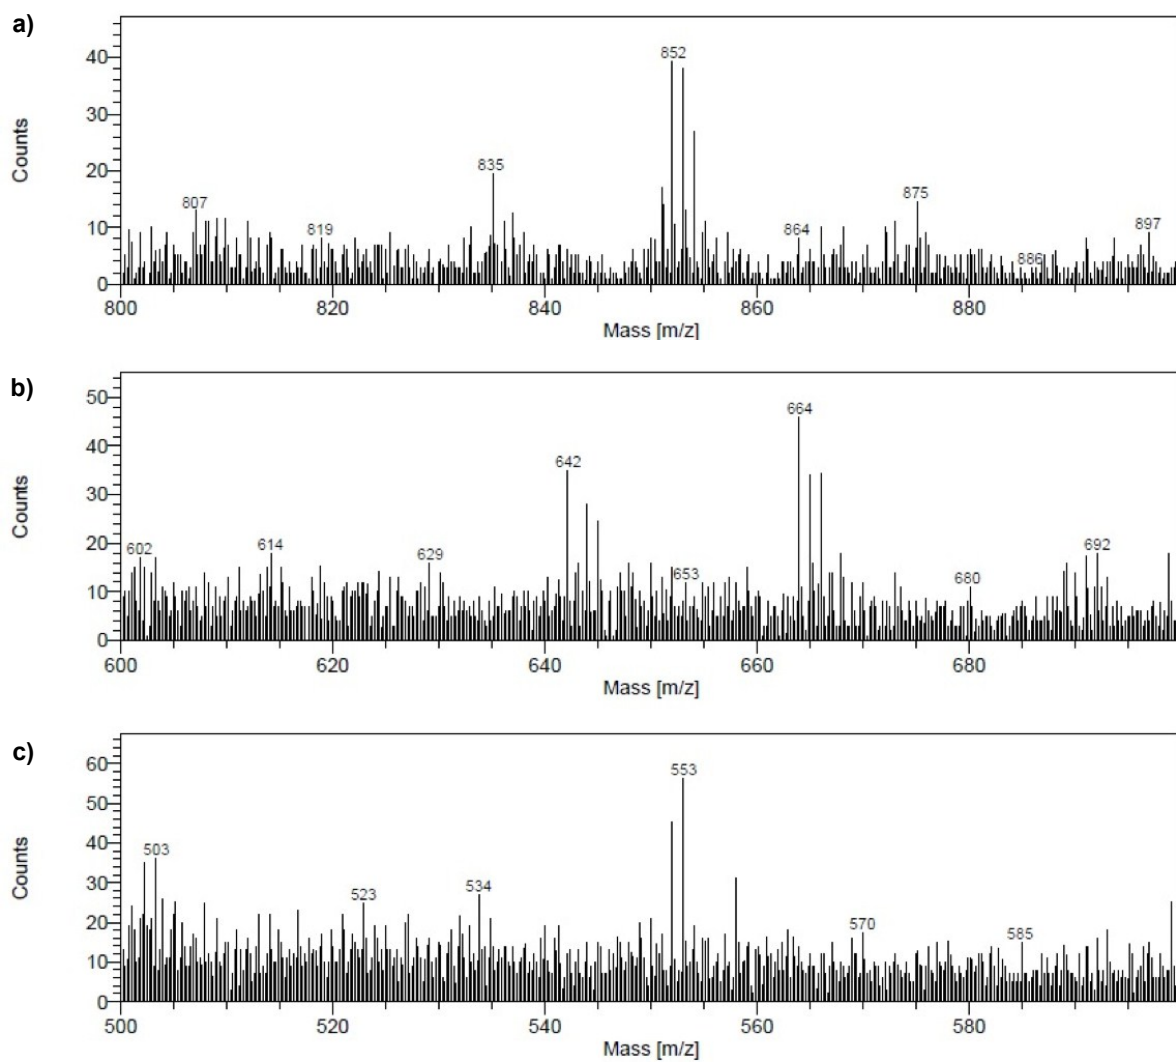

**Figure S17.** Positive mode ToF-SIMS spectra in the  $m/z$  ranges **a)** 800-900, **b)** 600-700 and **c)** 500-600 for the **NiO|RBG-174|CoC<sub>11</sub>P** electrode after two hours of light irradiation poised at  $E = 0.14$  V vs RHE in a MES 0.1 M/NaCl 0.1 M aqueous buffer at pH 5.5.

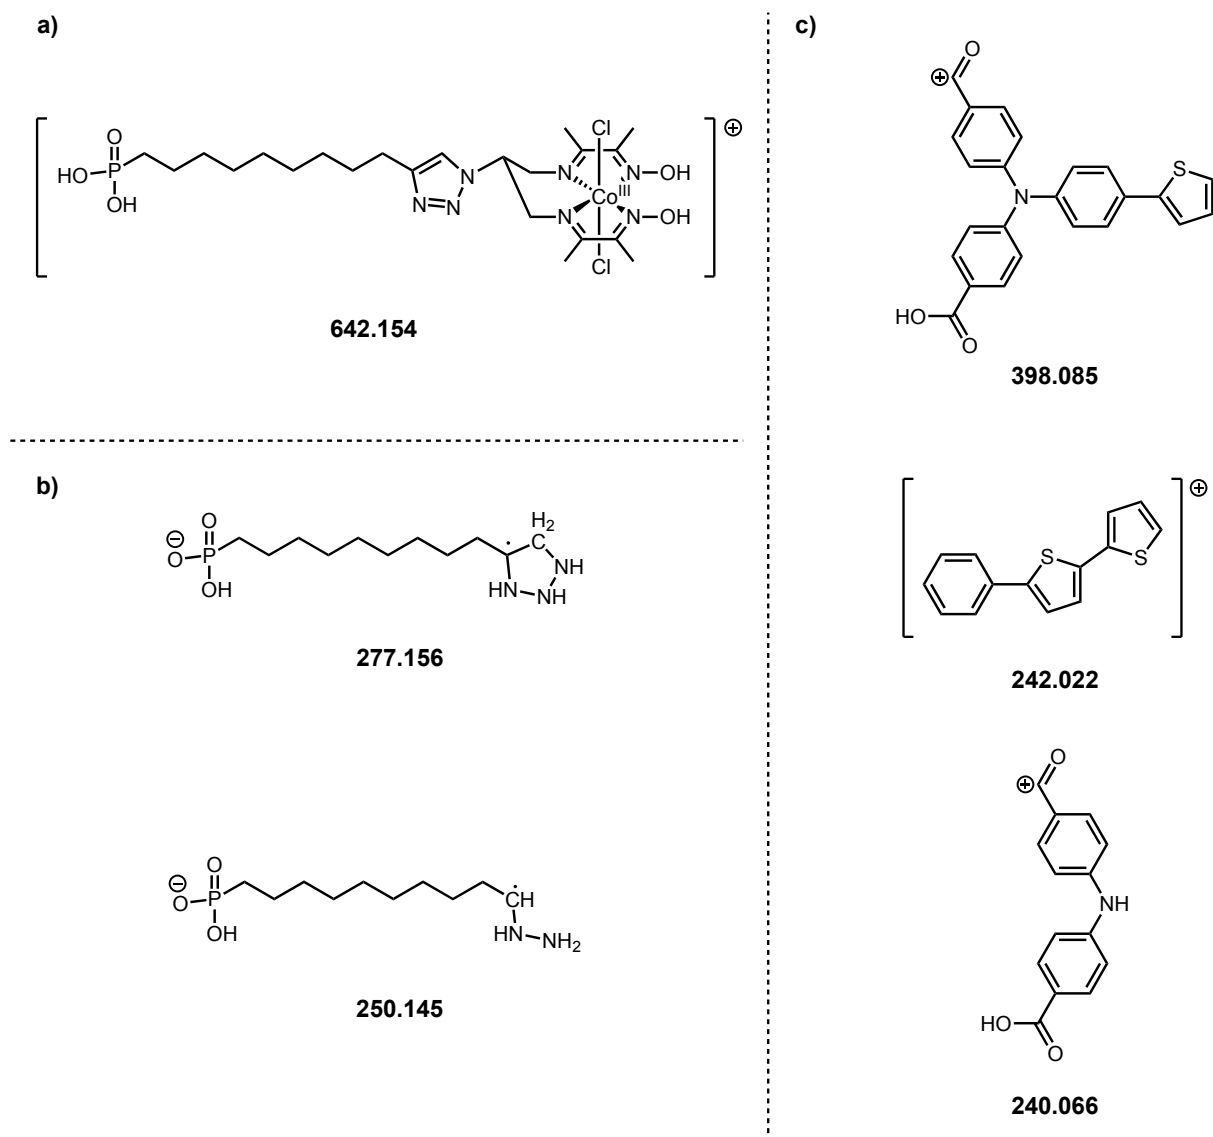

**Figure S18.** Proposed fragments (with corresponding exact masses) for the attribution of peaks for  $\text{Co}_{\text{C}_{11}\text{P}}$  in a) the positive mode and b) the negative mode and c) for **RBG-174** in the positive mode, in ToF-SIMS spectra at a  $\text{NiO}|\text{RBG-174}|\text{Co}_{\text{C}_{11}\text{P}}$  electrode after two hours of light irradiation poised at  $E = 0.14$  V vs RHE in a MES 0.1 M/NaCl 0.1 M aqueous buffer at pH 5.5.

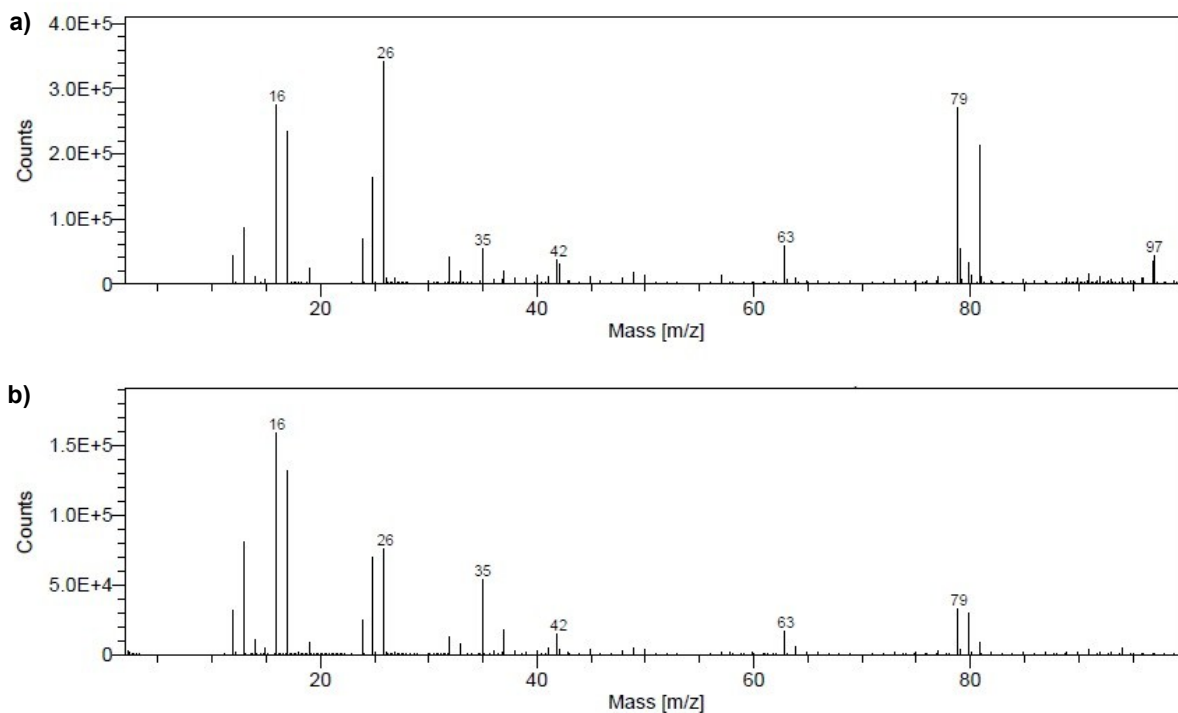

**Figure S19.** Negative mode ToF-SIMS spectra in the  $m/z$  0-100 range for the **NiO|RBG-174|Co<sub>C11P</sub>** electrode **a)** before and **b)** after two hours of light irradiation poised at  $E = 0.14$  V vs RHE in a MES 0.1 M/NaCl 0.1 M aqueous buffer at pH 5.5.

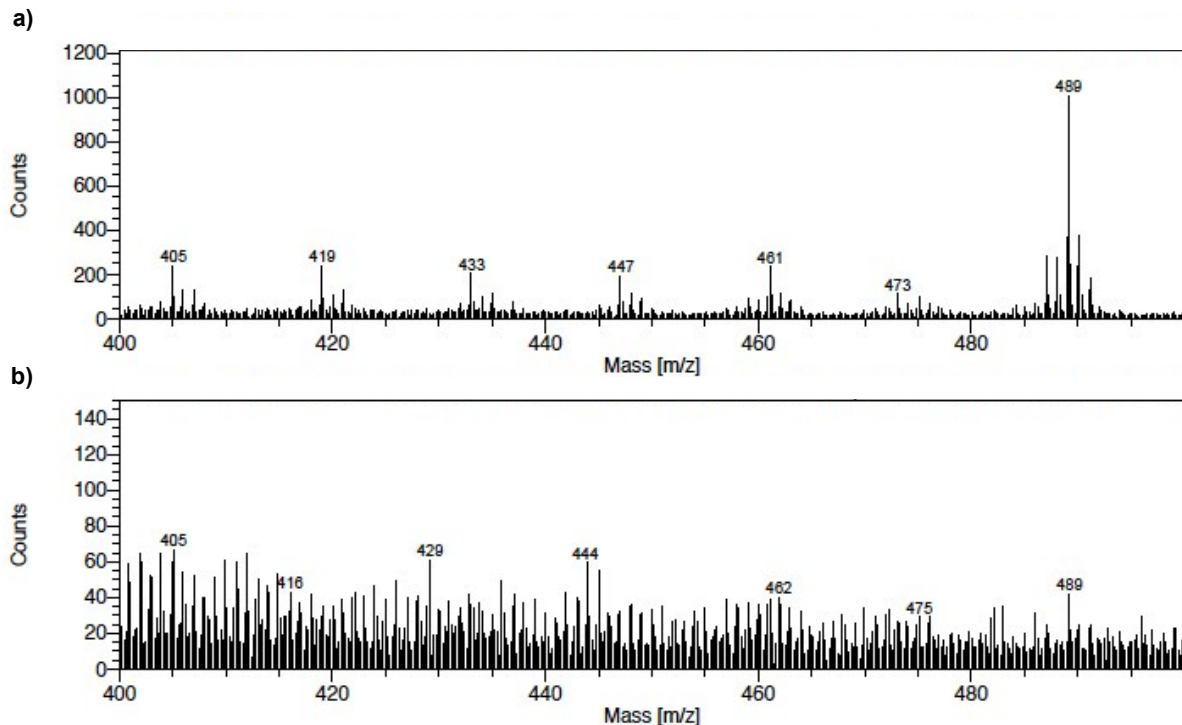

**Figure S20.** Positive mode ToF-SIMS spectra in the  $m/z$  400-500 range for the **NiO|RBG-174|Co<sub>C11P</sub>** electrode **a)** before and **b)** after two hours of light irradiation poised at  $E = 0.14$  V vs RHE in a MES 0.1 M/NaCl 0.1 M aqueous buffer at pH 5.5.

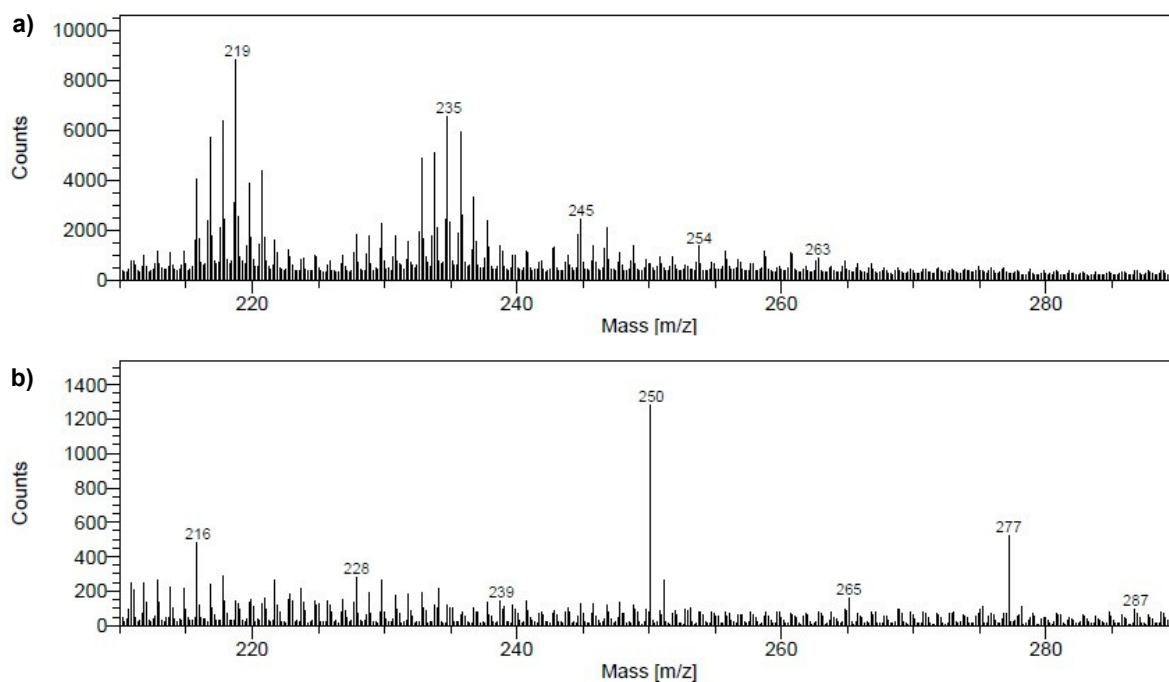

**Figure S21.** Negative mode ToF-SIMS spectra in the  $m/z$  200-300 range for the **NiO|RBG-174|Co<sub>11</sub>P** electrode **a)** before and **b)** after two hours of light irradiation poised at  $E = 0.14$  V vs RHE in a MES 0.1 M/NaCl 0.1 M aqueous buffer at pH 5.5.

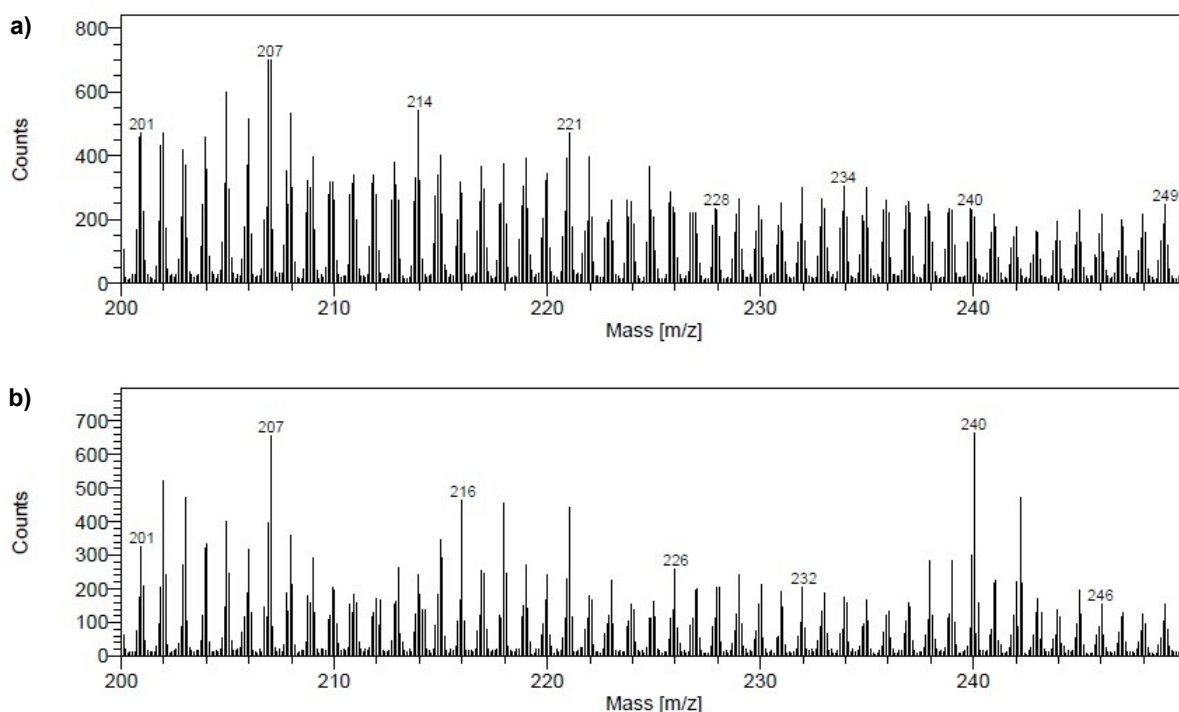

**Figure S22.** Positive mode ToF-SIMS spectra in the  $m/z$  200-250 range for the **NiO|RBG-174|Co<sub>11</sub>P** electrode **a)** before and **b)** after two hours of light irradiation poised at  $E = 0.14$  V vs RHE in a MES 0.1 M/NaCl 0.1 M aqueous buffer at pH 5.5.

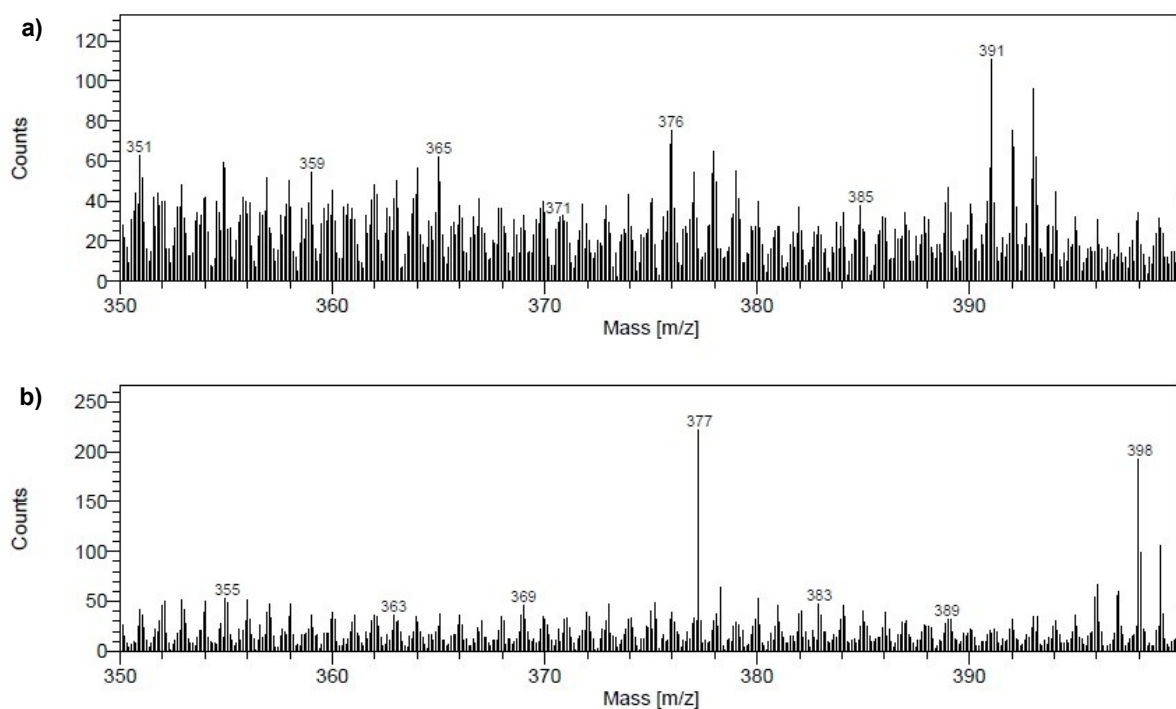

**Figure S23.** Positive mode ToF-SIMS spectra in the  $m/z$  350-400 range for the **NiO|RBG-174|CoC<sub>11</sub>P** electrode **a)** before and **b)** after two hours of light irradiation poised at  $E = 0.14$  V vs RHE in a MES 0.1 M/NaCl 0.1 M aqueous buffer at pH 5.5.

## References

1. (a) Dini, D.; Halpin, Y.; Vos, J. G.; Gibson, E. A., The influence of the preparation method of NiOx photocathodes on the efficiency of p-type dye-sensitized solar cells. *Coord. Chem. Rev.* **2015**, *304-305*, 179-201; (b) Boschloo, G.; Hagfeldt, A., Spectroelectrochemistry of nanostructured NiO. *J. Phys. Chem. B* **2001**, *105* (15), 3039-3044.
